# Supplementary material
Source: MDPI journal article supplement (https://www.mdpi.com/2073-4441/13/18/2465)
Supplement: s1 [file s1]

**Supplementary Table S1.** Chemical concentrations of raw and treated DWTRs per unit mass of dry sludge.

|                 | <b>Aluminum (Al)</b> | <b>Calcium (Ca)</b> | <b>Iron (Fe)</b> | <b>Magnesium (mg)</b> | <b>Manganese (Mn)</b> | <b>Zinc (Zn)</b> | <b>Total N (TN)</b> | <b>Total P (TP)</b> |
|-----------------|----------------------|---------------------|------------------|-----------------------|-----------------------|------------------|---------------------|---------------------|
|                 | (mg/kg)              | (mg/kg)             | (mg/kg)          | (mg/kg)               | (mg/kg)               | (mg/kg)          | (mg/kg)             | (mg/kg)             |
| <b>BP-RAW</b>   | 105,304              | 3,863               | 28,365           | 2,012                 | 4,317                 | 42.19            | 14,000              | 789.3               |
| <b>MS-RAW</b>   | 78,722               | 6,414               | 41,470           | 3,559                 | 21,586                | 67.26            | 15,000              | 845.0               |
| <b>TP-RAW</b>   | 82,901               | 4,439               | 37,131           | 3,433                 | 1,165                 | 69.36            | 10,000              | 1,400               |
| <b>UD-RAW</b>   | 110,000              | 4,237               | 26,210           | 2,093                 | 6,958                 | 64.06            | 17,000              | 4,400               |
| <b>TP-W</b>     | 86,490               | 1,864               | 33,810           | 1,573                 | 1,483                 | 71.74            | 3,900               | 331.2               |
| <b>TP-MW</b>    | 142,872              | 5,504               | 41,193           | 5,126                 | 1,257                 | 101.00           | 7,722               | 711.5               |
| <b>TP-200</b>   | 108,300              | 2,009               | 35,280           | 1,384                 | 1,373                 | 65.09            | 9,000               | 343.4               |
| <b>TP-OL200</b> | 154,416              | 6,384               | 42,789           | 5,285                 | 1,336                 | 98.99            | 8,794               | 703.9               |
| <b>TP-600</b>   | 123,600              | 2,182               | 39,990           | 2,402                 | 1,634                 | 96.92            | 5,100               | 365.0               |
| <b>TP-OL600</b> | 187,245              | 6,478               | 49,072           | 7,820                 | 1,558                 | 113.40           | 6,226               | 814.4               |
| <b>TP-MW600</b> | 180,868              | 6,007               | 48,519           | 7,885                 | 1,514                 | 98.73            | 2,453               | 820.9               |
| <b>UD-W</b>     | 125,700              | 1,785               | 22,050           | 905                   | 7,011                 | 60.90            | 13,100              | 1,221.0             |
| <b>UD-MW</b>    | 156,341              | 4,944               | 25,700           | 2,572                 | 7,106                 | 85.08            | 10,075              | 2,443.0             |
| <b>UD-200</b>   | 146,500              | 2,259               | 20,700           | 861                   | 7,680                 | 62.05            | 15,500              | 1,224.0             |
| <b>UD-OL200</b> | 166,647              | 4,740               | 27,823           | 2,784                 | 7,939                 | 86.99            | 13,699              | 2,669.0             |
| <b>UD-600</b>   | 188,000              | 2,539               | 30,870           | 1,785                 | 11,220                | 96.82            | 8,600               | 1,708.0             |
| <b>UD-OL600</b> | 215,235              | 7,140               | 35,507           | 5,229                 | 10,148                | 100.50           | 10,235              | 3,744.0             |
| <b>UD-MW600</b> | 222,624              | 6,826               | 36,536           | 5,170                 | 10,119                | 112.00           | 8,892               | 3,726.0             |

**Supplementary Table S2.** Concentration of Al, Fe, and forms of N in wastewater generated during single washing (W). 100 g of dry DWTR was dissolved in 1 L of water (1:10 m/v ratio).

|           | <b>Aluminum (Al)</b> | <b>Iron (Fe)</b> | <b>Total N</b> | <b>TKN</b> | <b>Ammonia (NH<sub>3</sub>-N)</b> | <b>Organic N</b> | <b>Nitrate (NO<sub>3</sub>-N)</b> | <b>Nitrite (NO<sub>2</sub>-N)</b> |
|-----------|----------------------|------------------|----------------|------------|-----------------------------------|------------------|-----------------------------------|-----------------------------------|
|           | (mg/L)               | (mg/L)           | (mg/L)         | (mg/L)     | (mg/L)                            | (mg/L)           | (mg/L)                            | (mg/L)                            |
| <b>TP</b> | 3.40                 | 1.86             | 11.17          | 11.14      | 4.18                              | 6.99             | ND                                | ND                                |
| <b>UD</b> | 22.08                | 4.83             | 34.59          | 34.55      | 5.85                              | 28.70            | ND                                | ND                                |

ND = not detected

**Supplementary Table S3.** Average mass of nitrogen (N) leached into deionized water (n=3) during leaching tests per unit of dry DWTR mass, as categorized by form of N.

|                 | <b>Total N</b> | <b>TKN</b> | <b>Ammonia (NH<sub>3</sub>-N)</b> | <b>Organic N</b> | <b>Nitrate (NO<sub>3</sub>-N)</b> | <b>Nitrite (NO<sub>2</sub>-N)</b> |
|-----------------|----------------|------------|-----------------------------------|------------------|-----------------------------------|-----------------------------------|
|                 | (mg/kg)        | (mg/kg)    | (mg/kg)                           | (mg/kg)          | (mg/kg)                           | (mg/kg)                           |
| <b>TP</b>       | 135.6          | 134.8      | 47.9                              | 86.9             | 0.4                               | 0.4                               |
| <b>TP-200</b>   | 158.6          | 192.0      | 75.2                              | 116.8            | 1.0                               | 0.3                               |
| <b>TP-600</b>   | 114.5          | 114.0      | ND                                | 114.0            | 0.5                               | ND                                |
| <b>TP-W</b>     | 297.1          | 309.6      | 27.9                              | 281.7            | 0.9                               | 0.7                               |
| <b>TP-OL200</b> | 878.8          | 870.9      | 252.9                             | 618.0            | 5.2                               | 2.6                               |
| <b>TP-OL600</b> | ND             | ND         | ND                                | ND               | ND                                | ND                                |
| <b>TP-MW</b>    | ND             | ND         | ND                                | ND               | ND                                | ND                                |
| <b>TP-MW600</b> | ND             | ND         | ND                                | ND               | ND                                | ND                                |
| <b>UD</b>       | 407.9          | 406.9      | 130.5                             | 276.4            | 0.7                               | 0.2                               |
| <b>UD-200</b>   | 561.8          | 596.7      | 73.6                              | 523.0            | 0.9                               | 1.0                               |
| <b>UD-600</b>   | 231.7          | 230.6      | ND                                | 230.6            | 3.2                               | ND                                |
| <b>UD-W</b>     | 375.4          | 428.3      | 108.6                             | 319.7            | 1.2                               | 0.5                               |
| <b>UD-OL200</b> | 1432.0         | 1432.0     | 426.8                             | 1005.2           | ND                                | ND                                |
| <b>UD-OL600</b> | ND             | ND         | ND                                | ND               | ND                                | ND                                |
| <b>UD-MW</b>    | 186.4          | 186.0      | ND                                | 186.0            | 0.2                               | 0.2                               |
| <b>UD-MW600</b> | ND             | ND         | ND                                | ND               | ND                                | ND                                |

ND = not detected
